# Supplementary material for: Fast and accurate line detection with GPU-based least median of squares
Source: Springer Nature journal article supplement (doi:10.1007/s11554-018-0827-3), 2018-10-05
Supplement: 11554_2018_827_MOESM1_ESM.pdf [file 11554_2018_827_MOESM1_ESM.pdf]

Gil Shapira · Tal Hassner

# Fast and Accurate Line Detection with GPU Based Least Median of Squares - Supplemental Material

Received: date / Revised: date

---

## 1 Introduction

This is a supplemental material to the paper "Fast and Accurate Line Detection with GPU Based Least Median of Squares". Here we extend the results of our line detection method presented on the paper. The results are taken from the following experiments:

- Line detection on synthetic noisy images see Fig 1.
- Maritime horizon detection See Fig. 2.
- Perseids detection. See Fig.3. The perseids images are taken from the International Meteor Organization website (<https://www.imo.net>)

---

Gil Shapira  
Department of Mathematics and Computer Science, The  
Open University of Israel, Israel  
Samsung Israel Research Center (SIRC) E-mail:  
gil.shapira@samsung.com

Tal Hassner  
Department of Mathematics and Computer Science, The  
Open University of Israel, Israel  
University of Southern California, Information Sciences  
Institute, CA, USA E-mail: hassner@openu.ac.il

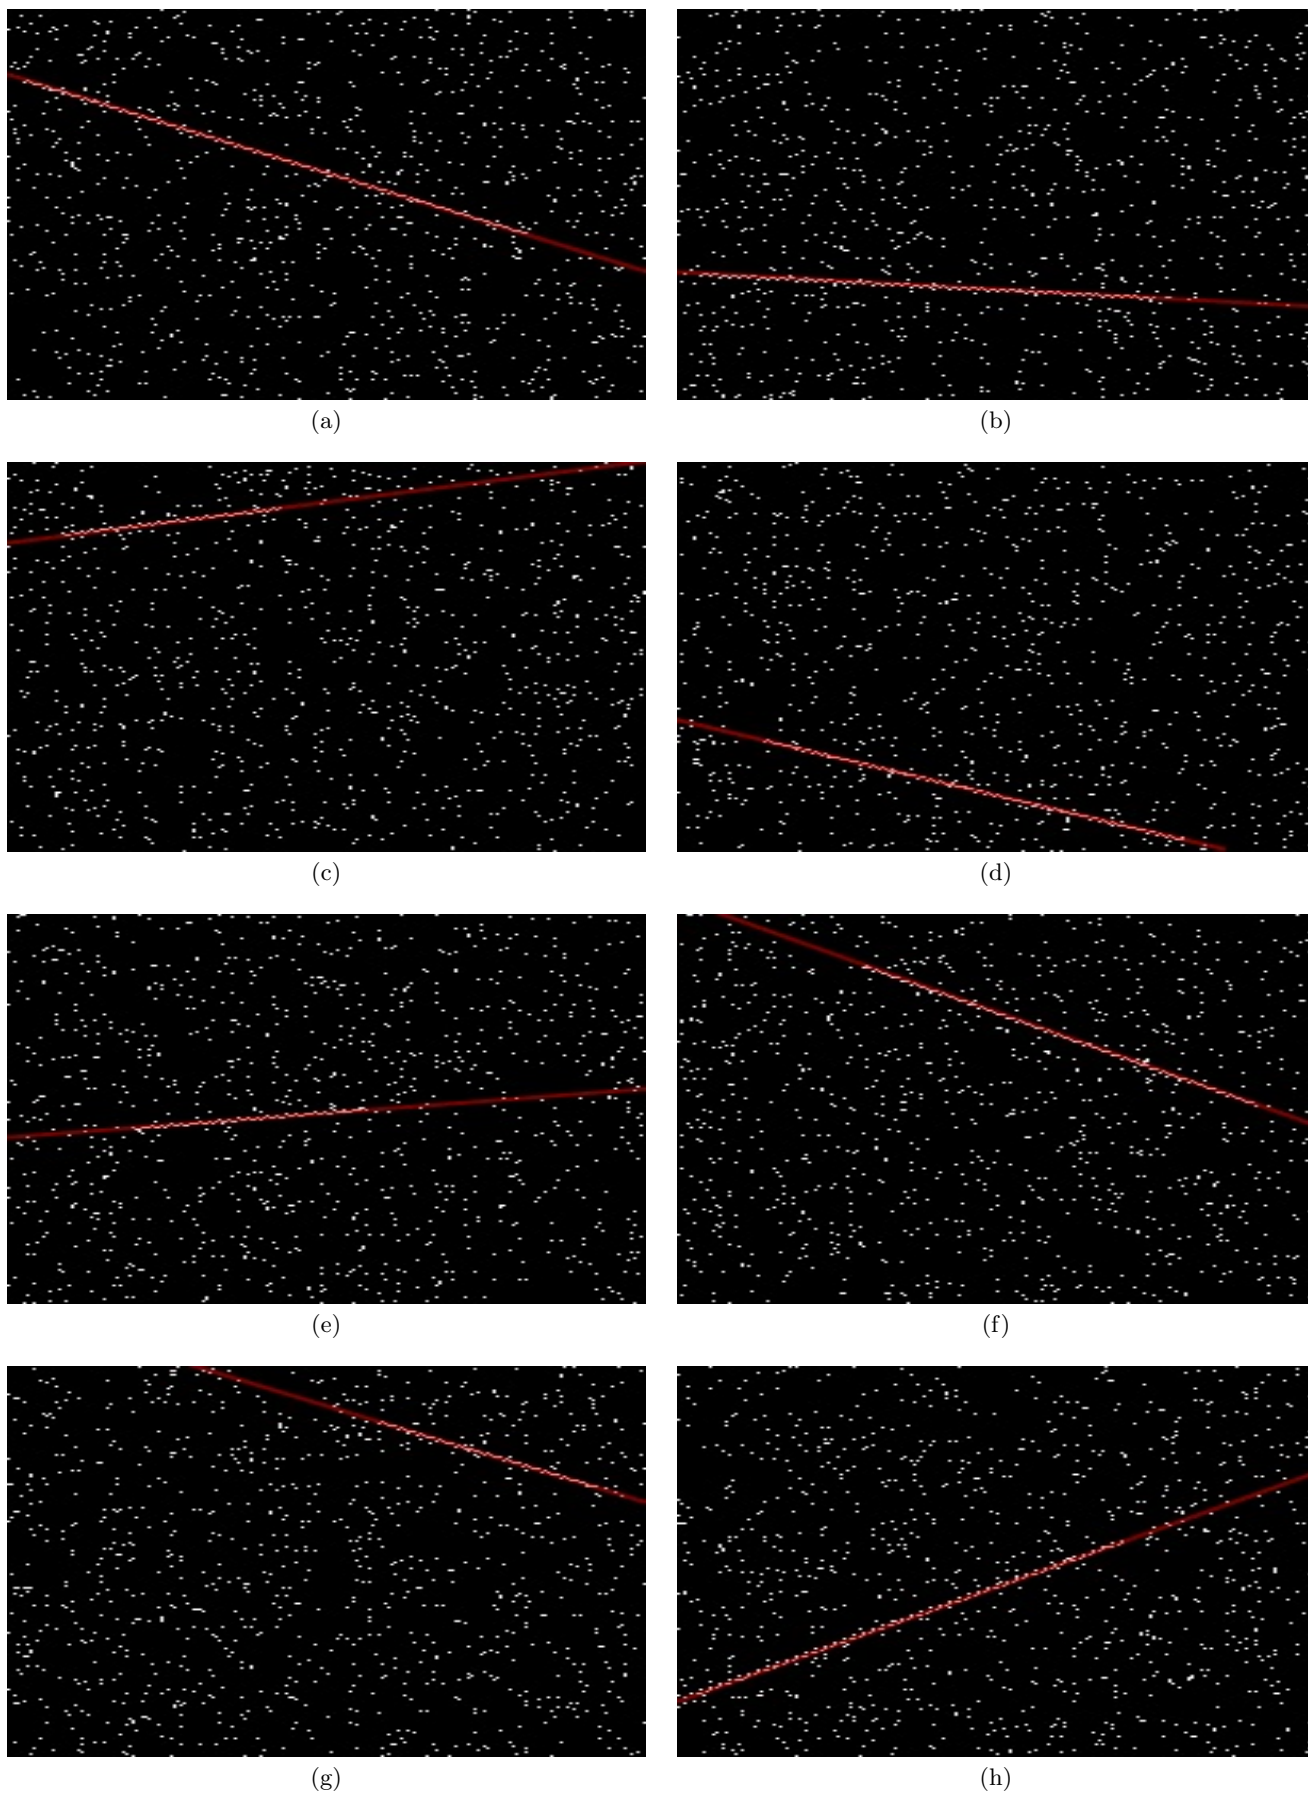

Fig. 1: Qualitative results for our HT-CLMS on synthetic images. Please see Sec. 4.1 in the paper for further details.

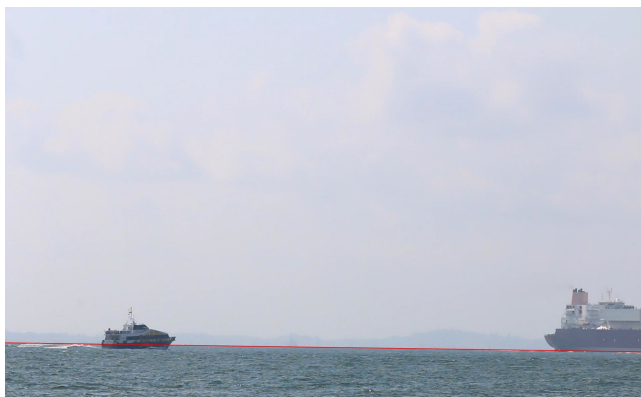

(a)

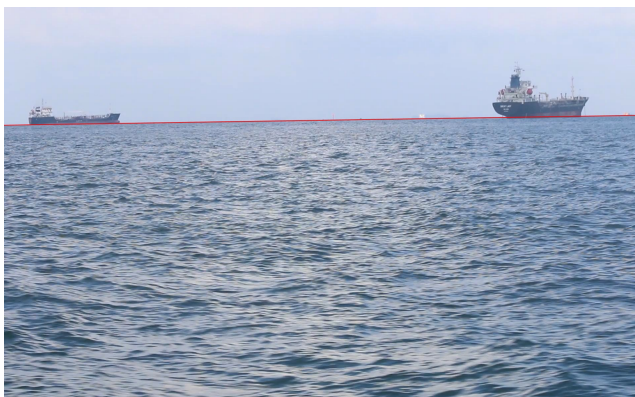

(b)

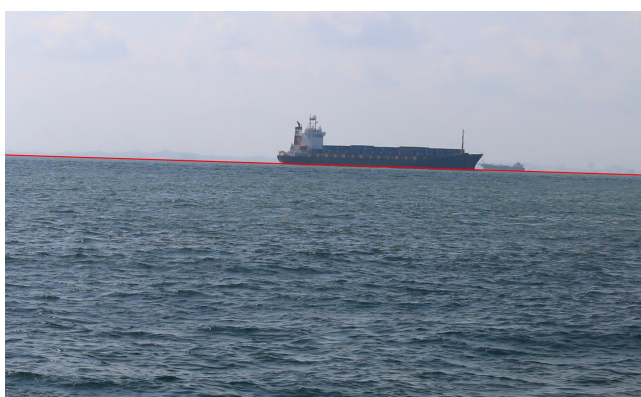

(c)

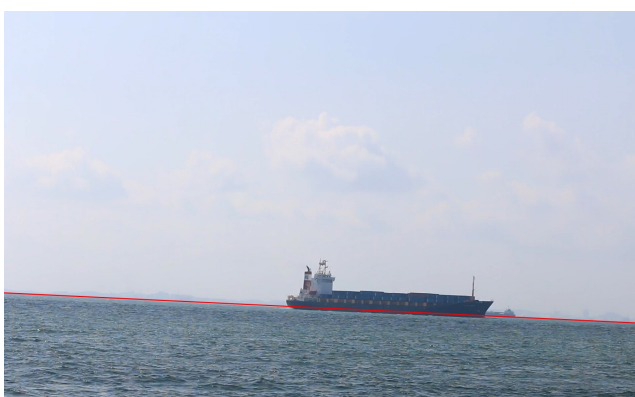

(d)

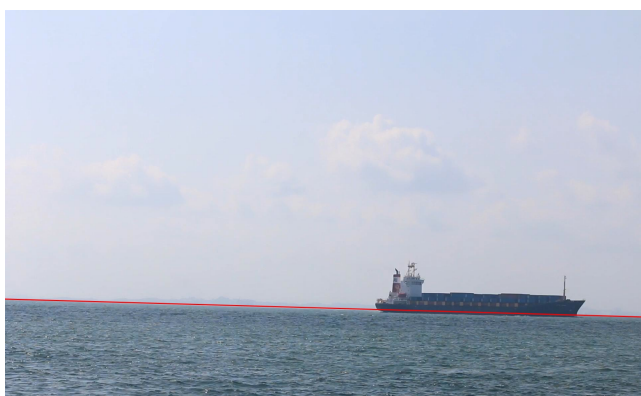

(e)

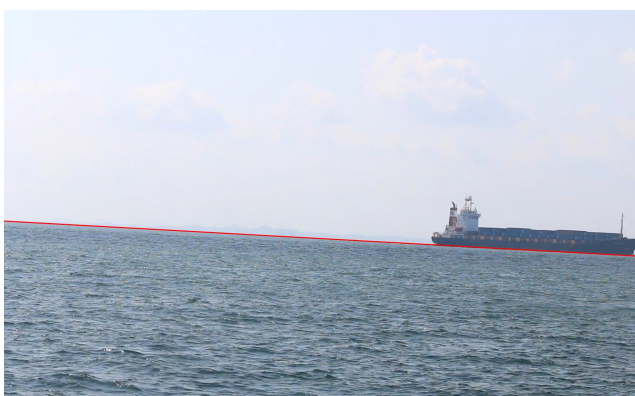

(f)

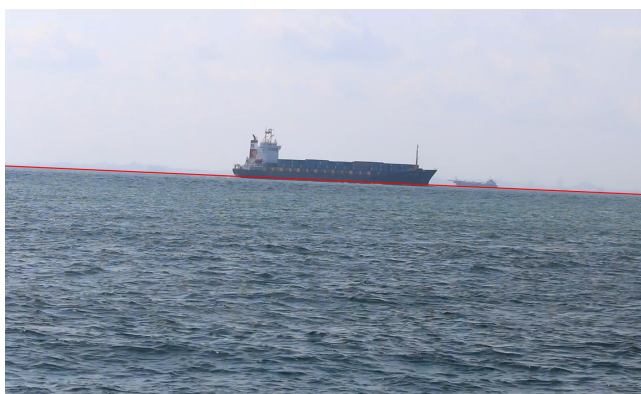

(g)

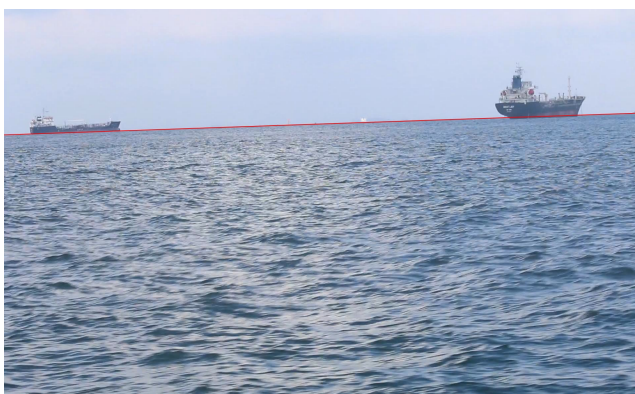

(h)

Fig. 2: Horizon detection results. Addendum to Fig. 10 in the paper. Please see Sec. 4.3 in the paper for further details.

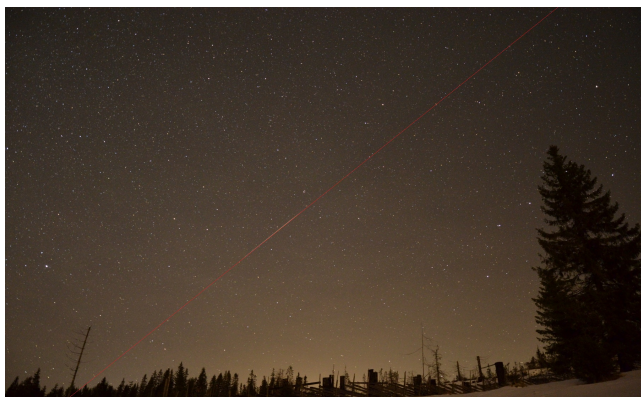

(a)

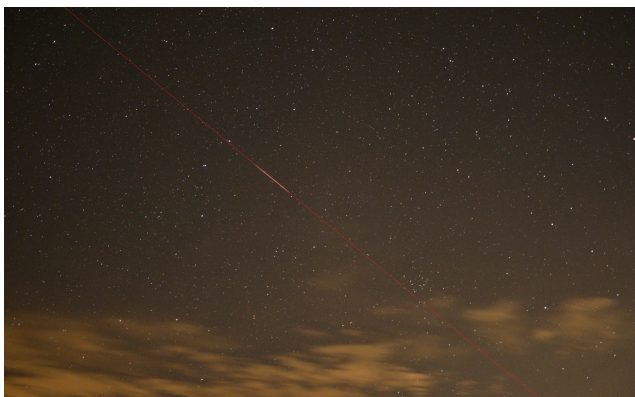

(b)

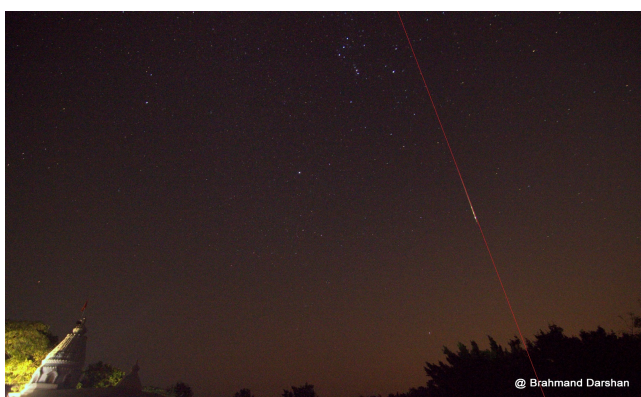

(c)

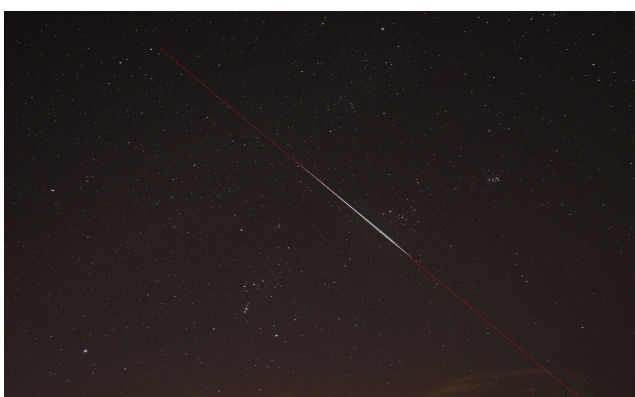

(d)

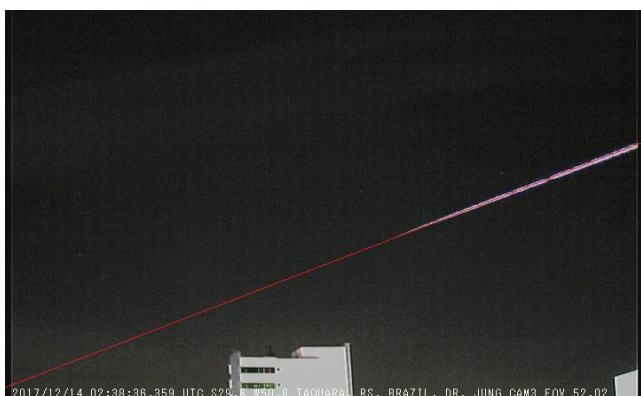

(e)

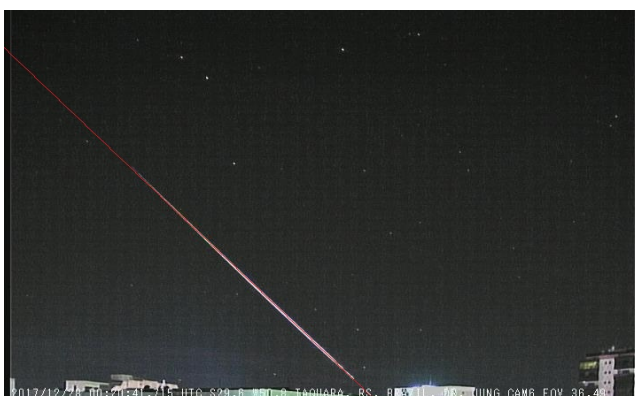

(f)

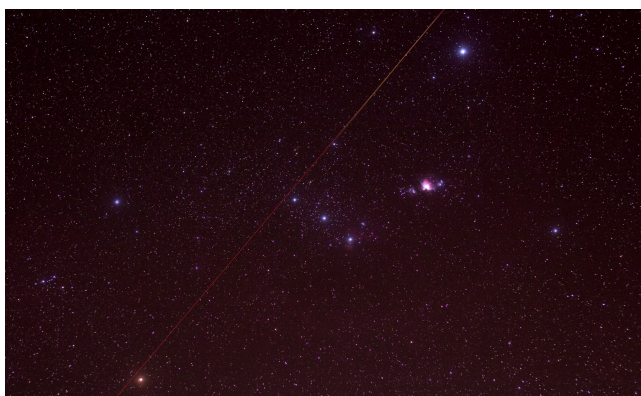

(g)

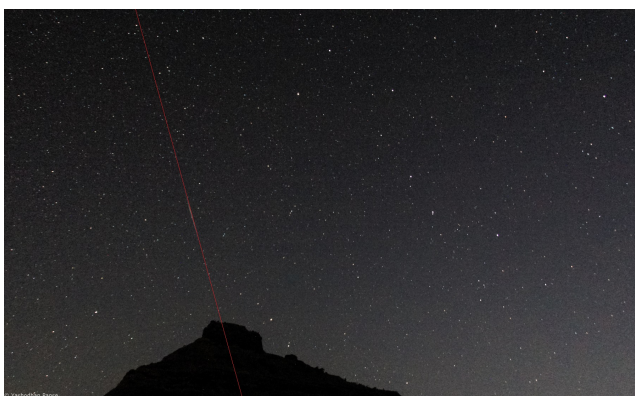

(h)

Fig. 3: Meteorites detection results. Addendum to Fig. 9 in the paper. Please see Sec. 4.3 in the paper for further details.
